RESEARCH ARTICLE

# Association between suicide-related ideations and affective temperaments in the Japanese general adult population

Nobuyuki Mitsui<sup>1☯\*</sup>, Yukiei Nakai<sup>1☯</sup>, Takeshi Inoue<sup>2☯</sup>, Niki Udo<sup>1‡</sup>, Kan Kitagawa<sup>1‡</sup>, Yumi Wakatsuki<sup>1‡</sup>, Rie Kameyama<sup>1‡</sup>, Atsuhito Toyomaki<sup>1</sup>, Yoichi M. Ito<sup>3</sup>, Yuji Kitaichi<sup>1</sup>, Shin Nakagawa<sup>1‡</sup>, Ichiro Kusumi<sup>1</sup>

**1** Department of Psychiatry, Hokkaido University Graduate School of Medicine, Hokkaido, Japan,

**2** Department of Psychiatry, Tokyo Medical University, Tokyo, Japan, **3** Department of Biostatistics, Hokkaido University Graduate School of Medicine, Sapporo, Hokkaido, Japan

☯ These authors contributed equally to this work.

‡ These authors also contributed equally to this work.

\* [nmitsui@med.hokudai.ac.jp](mailto:nmitsui@med.hokudai.ac.jp)

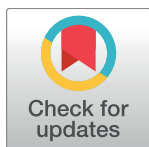

## OPEN ACCESS

**Citation:** Mitsui N, Nakai Y, Inoue T, Udo N, Kitagawa K, Wakatsuki Y, et al. (2017) Association between suicide-related ideations and affective temperaments in the Japanese general adult population. PLoS ONE 12(6): e0179952. <https://doi.org/10.1371/journal.pone.0179952>

**Editor:** Kenji Hashimoto, Chiba Daigaku, JAPAN

**Received:** April 9, 2017

**Accepted:** June 7, 2017

**Published:** June 22, 2017

**Copyright:** © 2017 Mitsui et al. This is an open access article distributed under the terms of the [Creative Commons Attribution License](https://creativecommons.org/licenses/by/4.0/), which permits unrestricted use, distribution, and reproduction in any medium, provided the original author and source are credited.

**Data Availability Statement:** All relevant data are within the paper.

**Funding:** This study was partly supported by the program "Integrated research on neuropsychiatric disorders" conducted under the Strategic Research Program for Brain Sciences of the Ministry of Education, Culture, Sports, Science, and Technology of Japan (<http://www.nips.ac.jp/srpbs/>); Research Grant 24-2 for Nervous and Mental Disorders from the Ministry of Health, Labor and Welfare; and a grant from the Interdisciplinary Project for Psychosomatological Research at

## Abstract

### Background

Suicide rates are vastly higher in Japan than in many other countries, although the associations between affective temperaments and suicide-related ideations in the general adult population remain unclear. Therefore, we aimed to elucidate these associations in the present study.

### Methods

We analyzed data from 638 Japanese volunteers who completed both the Patient Health Questionnaire (PHQ-9) and the Temperament Evaluation of the Memphis, Pisa, Paris, and San Diego Auto-questionnaire (TEMPS-A). Participants were then divided into three groups based on PHQ-9 summary scores and responses to the suicide-related ideation item: non-depressive control group (NC; N = 469), depressive symptoms without suicide-related ideations group (non-SI; N = 135), and depressive symptoms with suicide-related ideations group (SI; N = 34). The depressive symptoms were defined for PHQ-9 summary scores  $\geq 5$ , and the suicide-related ideations were defined for PHQ-9 #9 score  $\geq 1$ . We then compared TEMPS-A scores among the groups using Kruskal-Wallis tests. Then the 95% confidence intervals of differences in TEMPS-A subscale scores between the NC and non-SI groups, or between NC and SI groups, were calculated.

### Results

Participants of the SI group exhibited significantly higher scores on the depressive, irritable, and anxious temperament subscales than those of the non-SI group. Similarly, women of the SI group exhibited significantly higher scores of the depressive and irritable temperament subscales than women of the non-SI group, while men of the SI group exhibited

Hokkaido University. TI has received these fundings. The funders had no role in study design, data collection and analysis, decision to publish, or preparation of the manuscript.

**Competing interests:** The authors have declared that no competing interests exist.

significantly higher depressive temperament scores than those of the non-SI group. Among all participants and only men, cyclothymic subscale scores were higher in those of the SI group than the non-SI group (not significant), although the 95% confidence intervals did not overlap.

## Limitations

The cross-sectional study design was the main limitation.

## Conclusions

Depressive, irritable, and anxious temperaments are significant risk factors for suicide-related ideations in the Japanese general adult population. Furthermore, irritable temperament in women and depressive temperament in men are associated with suicide-related ideations.

## Introduction

Suicide is a major public health concern in Japan, with overall rates approximately 60% higher than the global average. In 2007, the Japanese government initiated a nine-step plan to decrease suicide rates by 20% over the next ten years by encouraging the investigation of suicide risk factors, changing cultural attitudes toward suicide, and improving treatment for those who have attempted suicide. Although some progress has been made, the prediction and prevention of suicide remain a high priority in Japan.

Researchers have aimed to elucidate the various factors contributing to suicide, which are categorized as either proximal or distal[1]. Proximal factors such as a recent history of attempted suicide have been regarded as the most powerful risk factors for short-term suicide [2, 3]. However, more than half of completed suicides are associated with a first attempt [4], indicating that treatment for attempted suicide is insufficient for suicide prevention. Moreover, those who complete suicide are less likely to seek mental health services[5]. Thus, suicide prevention efforts may be greatly improved by elucidating factors contributing to suicide among the general population.

Personality traits are thought to be among the most important distal risk factors of suicide, and some previous studies have reported that specific personality characteristics are associated with suicidal behaviors as well as suicidal ideation[6, 7]. Previous studies have revealed associations between suicidal ideation and various characteristics such as hopelessness (Beck Hopelessness Scale), neuroticism (Eysenck Personality Questionnaire), and harm avoidance (Temperament and Character Inventory)[8–11]. Suicidal ideation is also significantly associated with suicide attempts[9, 12] and completions[10]. Furthermore, recent studies have indicated that affective temperaments are associated with both suicide attempts and suicidal ideation[13].

Developed by Akiskal and colleagues, the modern concept of affective temperaments consists of five basic temperament types: depressive, cyclothymic, hyperthymic, irritable, and anxious[14]. Individual variations in temperament are assessed using the Temperament Evaluation of Memphis, Pisa, Paris, and San Diego Autoquestionnaire (TEMPS-A) [14, 15], which has also been utilized in recent research regarding suicidal ideation and suicidal behaviors [13, 16–20]. Recently, several studies have revealed an association between affective temperaments and suicide-related behaviors among patients with mood disorders [16, 17, 21], noting that

suicide attempts in this patient population were associated with depressive, irritable, anxious [22], and cyclothymic temperaments [22–24]. Another study involving patients with psychiatric conditions other than mood disorders indicated that suicide risk was associated with an irritable temperament [25].

Such findings suggest that affective temperaments play a significant role in the development of suicide-related behaviors in clinical populations. Although several studies have revealed an association between affective temperaments and suicide-related behaviors among individuals with mood disorders, relatively few have investigated such an association among the general population. One such study reported that a history of suicide attempts was significantly associated with depressive and cyclothymic temperaments in this population as well [20], while a recent study involving college students indicated that depressive, cyclothymic, and anxious temperaments were associated with suicidal ideation in both men and women [26]. A large-sample survey of the general population also suggested that anxious temperament is a strong risk factor for suicide attempts [18]. However, to our best knowledge, there is no study, which investigate the relationship between the affective temperaments and suicidal ideations among general adult population. Also, it is unclear the associations between gender and affective temperaments among the general adult population with suicidal ideations.

The aim of the present study was to investigate the association between affective temperament and suicidal ideation/thoughts of self-harm in the non-clinical general adult population. Gender differences of affective temperaments between participants with or without suicide-related ideations were also investigated in this study. To achieve this aim, we compared TEMPS-A subscale scores between participants with depression experiencing suicide-related ideations and those without suicide-related ideations.

## Materials and methods

### 1. Participants

The present study consisted of two survey periods (July 2011 to December 2011 and January 2014 to August 2014) involving 500 Japanese volunteers [27] and 853 Japanese volunteers [28], respectively. All participants, who had no history of psychiatric disease, were recruited from the non-clinical general adult population by flyers and word of mouth. We included data from 701 participants (286 from Survey 1 (57.2%) and 415 from Survey 2 (48.7%)) who completed both the Patient Health Questionnaire (PHQ-9) and the TEMPS-A. Sixty-one participants were further excluded from the Survey 2 dataset, as they had already participated in the first survey. Patient characteristics including gender, age, and education level were collected for all 640 remaining participants, who were then divided into three groups according to PHQ-9 scores. Participants with PHQ-9 summary scores  $\leq 4$  were categorized into the non-depressive control (NC) group. Participants with PHQ-9 summary scores  $> 4$  and PHQ-9 #9 scores of 0 were categorized into the “depressive symptoms without suicide-related ideations (non-SI)” group, while those with PHQ-9 summary scores  $> 4$  and PHQ-9 #9 scores  $\geq 1$  were categorized into the “depressive symptoms with suicide-related ideations (SI)” group. The PHQ-9 #9 scores  $\geq 1$  means that the participants had suicide-related ideations at least “several days” out of the week. We excluded two participants with PHQ-9 summary scores  $\leq 4$  and PHQ-9 #9 scores  $\geq 1$  to avoid bias associated with heterogeneous populations. A total of 638 (47.2%) participants were included in the final analysis.

Written informed consent was obtained from all participants. The present study was performed in accordance with the ethical standards established in the 1964 Declaration of Helsinki (amended in Fortaleza, October 2013) and approved by the institutional review board of Hokkaido University Hospital.

## 2. Measures

**2.1. PHQ-9.** The PHQ was developed as a self-report version of the Primary Care Evaluation of Mental Disorders (PRIME-MD). It was designed for the criteria-based diagnosis of several mental disorders commonly observed in primary care [29]. The validity of the depression module (PHQ-9) of the PHQ for screening major depressive episodes has been confirmed in primary care, medical outpatient, and specialty medical settings. Two recent meta-analyses have reported reliable sensitivity (0.80 and 0.77, respectively) and specificity (0.92 and 0.94, respectively) for the PHQ-9 [30, 31]. These numbers correspond with the DSM-IV diagnosis of major depressive disorder or major depressive episodes in primary care clinics and non-psychiatric clinics.

In the present study, we used the Japanese version of the PHQ-9, which also has excellent validity in primary care [32] and in psychiatric settings [33]. The PHQ-9 summary score assesses the severity of depression, which is divided into five categories: 0–4, 5–9, 10–14, 15–19, 20 or greater [34]. In the present study, depressive symptoms were defined for PHQ-9 summary scores  $\geq 5$ . After reviewing the data, when an individual responded that he or she had “Thoughts that you would be better off dead or of hurting yourself in some way” at least “several days” out of the week, he or she was considered to have “suicide-related ideations”. The meaning of the term “suicide-related ideations” includes ideas of both suicide and self-harm (Silverman et al., 2007). Thus, this term is coincident with a PHQ-9 #9 score  $\geq 1$ .

**2.2. Temperament evaluation of the Memphis, Pisa, Paris, and San Diego auto-questionnaire (TEMPS-A).** The TEMPS-A is a dichotomous self-report questionnaire containing 109 items for men and 110 items for women used to assess variations in depressive, cyclothymic, hyperthymic, irritable, and anxious temperaments [14, 15]. The depressive, cyclothymic, hyperthymic, and irritable (20 for men) subscales consist of 21 items, while the anxious subscale consists of 26 items. The TEMPS-A Japanese version, which has shown reliability and validity (internal consistency) in a non-clinical sample of Japanese participants, was administered in the present study [35].

## 3. Statistical analyses

Patient characteristics were summarized using descriptive statistics and subjected to the Kruskal-Wallis test. *Post hoc* analysis was performed using Dunn’s test. Kruskal-Wallis and Dunn’s tests were also performed for the analysis of TEMPS-A subscale scores. The 95% confidence intervals of differences in TEMPS-A subscale scores between the NC and non-SI groups, or between NC and SI groups, were then calculated according to gender, following which the 95% confidence intervals of mean scores on the TEMPS-A were compared between those of the SI and non-SI groups. We calculated 95% confidence intervals for differences between two unpaired population means (Gardner and Altman, 1986). Differences were considered significant at  $P < 0.05$ . SPSS version 21.0 (SPSS Inc., Japan) was used for all analyses.

## Results

### 1. Demographic data

The demographic data of the NC, non-SI, and SI groups are shown in Table 1. No significant differences in mean age were noted among the groups ( $P = 0.066$ ). Women comprised 43.3% of the NC group ( $N = 469$ ), 55.6% of the non-SI group ( $N = 135$ ), and 64.7% of the SI group ( $N = 34$ ), respectively. Kruskal-Wallis tests revealed significant differences in the distribution of gender among these three groups ( $P = 0.004$ ). *Post hoc* analyses using Dunn’s test revealed that this difference remained significant between the NC and non-SI groups ( $P = 0.012$ ), and

**Table 1. Demographic data.**

|                                              | NC          | non-SI     | SI         | P      |
|----------------------------------------------|-------------|------------|------------|--------|
| N                                            | 469         | 135        | 34         |        |
| Gender*                                      |             |            |            | 0.004  |
| Female                                       | 203 (43.3%) | 75 (55.6%) | 22 (64.7%) |        |
| Male                                         | 266 (56.7%) | 60 (44.4%) | 12 (35.3%) |        |
| Age <sup>†</sup> , mean (SD)                 | 42.9 (11.8) | 40.9(12.2) | 39.2(10.4) | 0.066  |
| Education*                                   |             |            |            | 0.009  |
| Junior high school or High school            | 94 (20.4%)  | 40 (29.6%) | 13 (38.2%) |        |
| Junior college, College or Graduate school   | 367 (79.6%) | 95 (70.4%) | 21 (61.8%) |        |
| Marital status*                              |             |            |            | 0.002  |
| Married                                      | 360 (76.8%) | 87 (64.4%) | 20 (58.8%) |        |
| Unmarried                                    | 107 (22.9%) | 48 (35.6%) | 14 (41.2%) |        |
| Past medical history*                        | 93 (19.8%)  | 30 (22.2%) | 9 (26.5%)  | 0.532  |
| Family history of psychiatric disorders*     | 60 (12.8%)  | 18 (13.3%) | 6 (17.6%)  | 0.727  |
| PHQ-9 summary score <sup>†</sup> , mean (SD) | 1.5(1.4)    | 7.1 (2.2)  | 12.7(5.5)  | <0.001 |

\*Kruskal-Wallis test

†ANOVA

Unknown cases of education (N = 8), and marital status (N = 2) were excluded.

NC, non-depressive control; non-SI, depressive symptoms without suicide-related ideations; SI, depressive symptoms with suicide-related ideations.

<https://doi.org/10.1371/journal.pone.0179952.t001>

between the NC and SI groups ( $P = 0.016$ ). Educational experiences were also significantly different among the groups ( $P = 0.009$ ), and *post hoc* analysis revealed the NC group had significantly higher levels of education than the SI ( $P = 0.018$ ), and non-SI ( $P = 0.026$ ) groups. The distribution of marital status was significantly different among the three groups ( $P = 0.002$ ), and *post hoc* analyses revealed that the marriage rate in NC group was significantly higher than that of the SI ( $P = 0.02$ ) and non-SI ( $P = 0.003$ ) groups. However, no significant difference was observed between the SI and non-SI groups ( $P = 0.508$ ). Significant differences in PHQ-9 summary scores of these three groups were also observed. *Post hoc* analysis revealed that PHQ-9 summary scores of the SI and non-SI groups were significantly higher than those of the NC group ( $P < 0.001$  for each). However, no significant difference in PHQ-9 summary score was observed between the SI and non-SI groups ( $P = 0.307$ ). No significant differences in demographic characteristics were observed between the SI and non-SI groups.

## 2. TEMPS-A scores

Kruskal-Wallis tests and *post hoc* analyses revealed that the depressive, cyclothymic, irritable, and anxious temperament scores of the SI and non-SI groups were significantly higher than those of the NC group (Table 2). Moreover, among all participants, the depressive, irritable, and anxious temperament scores of participants in the SI group were significantly higher than those of the non-SI group. Among female participants, the depressive and irritable temperament scores of participants in the SI group were significantly higher than those of women in the non-SI group. Among male participants, only the depressive temperament scores of men in the SI group were significantly higher than those of men in the non-SI group.

Among all participants, the 95% confidence intervals of mean depressive, cyclothymic, irritable, and anxious temperament scores in the SI group were higher than those in the non-SI group (Fig 1). Among female participants, the 95% confidence intervals for mean score differences in irritable temperament were higher for women of the SI group than for those of the

**Table 2. Comparison of TEMPS-A scores among participants.**

| TEMPS-A     | Gender | NC (1)      | non-SI (2)  | SI (3)      | Statistics* | P      | Post-hoc analyses† |            |            |
|-------------|--------|-------------|-------------|-------------|-------------|--------|--------------------|------------|------------|
|             |        | Mean(SD)    | Mean(SD)    | Mean(SD)    |             |        | (1) vs (2)         | (1) vs (3) | (2) vs (3) |
| Depressive  | All    | 1.32 (0.14) | 1.42 (0.16) | 1.54 (0.16) | 81.6        | <0.001 | <0.001             | <0.001     | 0.001      |
|             | Female | 1.36 (0.14) | 1.45 (0.16) | 1.55 (0.16) | 37.4        | <0.001 | <0.001             | <0.001     | 0.019      |
|             | Male   | 1.29 (0.14) | 1.38 (0.16) | 1.53 (0.16) | 36.5        | <0.001 | <0.001             | <0.001     | 0.035      |
| Cyclothymic | All    | 1.14 (0.15) | 1.31 (0.22) | 1.44 (0.27) | 106.3       | <0.001 | <0.001             | <0.001     | 0.075      |
|             | Female | 1.15 (0.13) | 1.35 (0.23) | 1.43 (0.27) | 63.2        | <0.001 | <0.001             | <0.001     | 0.345      |
|             | Male   | 1.13 (0.15) | 1.25 (0.18) | 1.46 (0.30) | 40.0        | <0.001 | <0.001             | <0.001     | 0.158      |
| Hyperthymic | All    | 1.28 (0.20) | 1.22 (0.17) | 1.23 (0.22) | 4.7         | 0.006  | 0.005              | 0.066      | 0.789      |
|             | Female | 1.24 (0.17) | 1.22 (0.18) | 1.19 (0.17) | 2.7         | 0.257  | -                  | -          | -          |
|             | Male   | 1.31 (0.21) | 1.23 (0.16) | 1.31 (0.28) | 7.6         | 0.022  | 0.006              | 0.728      | 0.358      |
| Irritable   | All    | 1.10 (0.13) | 1.19 (0.16) | 1.32 (0.23) | 52.7        | <0.001 | <0.001             | <0.001     | 0.017      |
|             | Female | 1.10 (0.12) | 1.21 (0.17) | 1.34 (0.21) | 54.8        | <0.001 | <0.001             | <0.001     | 0.012      |
|             | Male   | 1.11 (0.13) | 1.18 (0.15) | 1.28 (0.28) | 23.6        | <0.001 | <0.001             | 0.008      | 0.579      |
| Anxious     | All    | 1.14 (0.14) | 1.28 (0.21) | 1.40 (0.24) | 72.2        | <0.001 | <0.001             | <0.001     | 0.029      |
|             | Female | 1.16 (0.15) | 1.33 (0.22) | 1.44 (0.23) | 56.7        | <0.001 | <0.001             | <0.001     | 0.097      |
|             | Male   | 1.12 (0.13) | 1.22 (0.17) | 1.32 (0.25) | 26.8        | <0.001 | <0.001             | 0.001      | 0.297      |

\* Kruskal-Wallis test

†Dunn test

NC, Non-depressive controls; non-SI, Depressive symptoms without suicide-related ideations; SI, Depressive symptoms with suicide-related ideations

<https://doi.org/10.1371/journal.pone.0179952.t002>

non-SI group (Fig 2). Among male participants, the 95% confidence intervals for mean score differences in depressive and cyclothymic temperaments were higher for men of the SI group than those of the non-SI group (Fig 3).

The results of Kruskal-Wallis tests and *post hoc* tests were consistent with the results of the 95% confidence intervals of mean score on the depressive, irritable, and anxious temperaments in all participants, the irritable temperament in female participants, and the depressive temperament in male participants. Kruskal-Wallis tests and *post hoc* tests revealed that female participants of the SI group had significantly higher depressive temperament scores than those of the non-SI group, although the 95% confidence intervals overlapped. These analyses also revealed that, among all participants and only men, cyclothymic subscale scores were higher in those of the SI group than the non-SI group (not significant), although the 95% confidence intervals did not overlap.

## Discussion

The present study revealed that adult participants of the general population with depressive symptoms experiencing suicide-related ideations (i.e., ideas of suicide or self-harm) exhibited higher scores on the TEMPS-A depressive, irritable, and anxious temperament subscales than those without suicide-related ideations. Furthermore, women with suicide-related ideations exhibited higher scores on the irritable temperament subscale than those without suicide-related ideations. In contrast, men with suicide-related ideations exhibited higher scores on the depressive temperament subscale than those without suicide-related ideations.

These results suggest that depressive temperament contributes significantly to the incidence of suicide-related ideations in individuals of the general adult population with sub-clinical depressive symptoms, consisting with the findings of previous studies regarding attempted suicide. In a previous cross-sectional study of public school students (n = 1,713), depressive



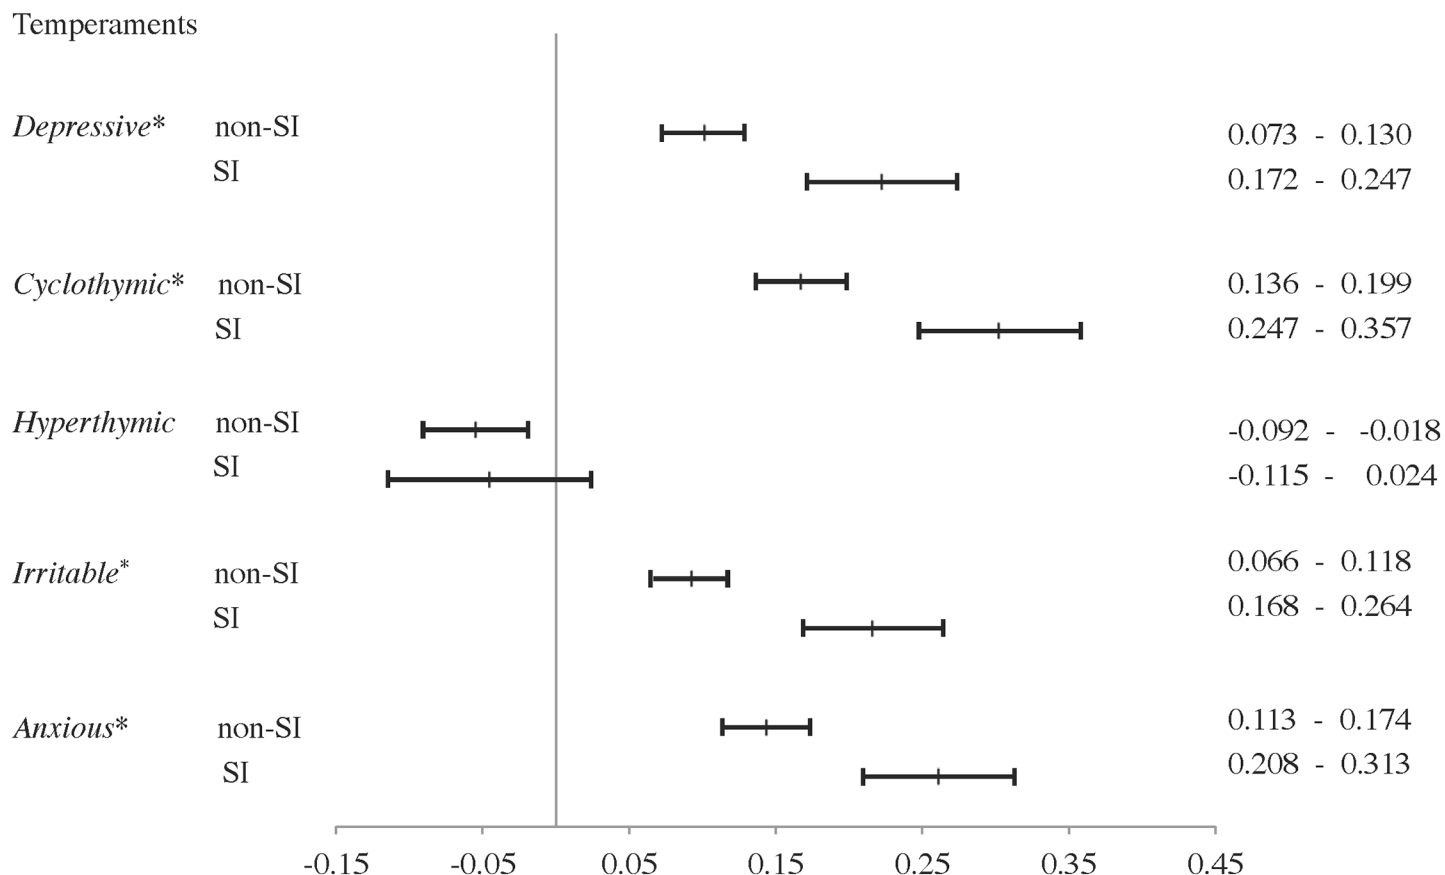

**Fig 1. Comparison of TEMPS-A between participants with or without suicide-related ideations on TEMPS-A scores via 95% confidence intervals.** SI, depressive symptoms with suicide-related ideations; non-SI, depressive symptoms without suicide-related ideations; TEMPS-A, Temperament Evaluation of Memphis, Pisa, Paris, and San Diego Auto-questionnaire. \* 95% Confidence Intervals of non-SI group did not overlap with those of the SI group.

<https://doi.org/10.1371/journal.pone.0179952.g001>

temperament was significantly associated with self-harm in both genders [36]. In another previous study of 150 nonviolent suicide attempters, scores for the depressive, cyclothymic, irritable, and anxious temperament subscales were significantly associated with suicide attempts, and the odds ratios for dominant depressive temperament (mean+ 2SD or above) was significantly high [22]. Furthermore, in a cross-sectional study involving healthy college students (n = 1,381), the TEMPS-M depressive, cyclothymic, and anxious temperament scores were significantly associated with suicidal ideations, and depressive temperament had the highest odds ratio as a predictor of lifetime suicidal ideations among all participants [26]. These findings suggest that depressive temperament plays an important role in the development of suicide-related ideations. Individuals with depressive temperament have a tendency towards lowered mood, and the primary cognitive features associated with depressive temperament include low self-esteem and self-criticism [14]. Previous studies have indicated that self-esteem is negatively correlated with suicide rates at the national level, especially among Japanese individuals, in whom the lowest levels of self-esteem were observed [37]. Previously, we observed significant relationships between suicide risk and low self-esteem among Japanese university students [38]. The present study suggests that depressive temperament as measured by the TEMPS-A is among the most important risk factors for suicide-related ideations in the general adult population, especially in men.

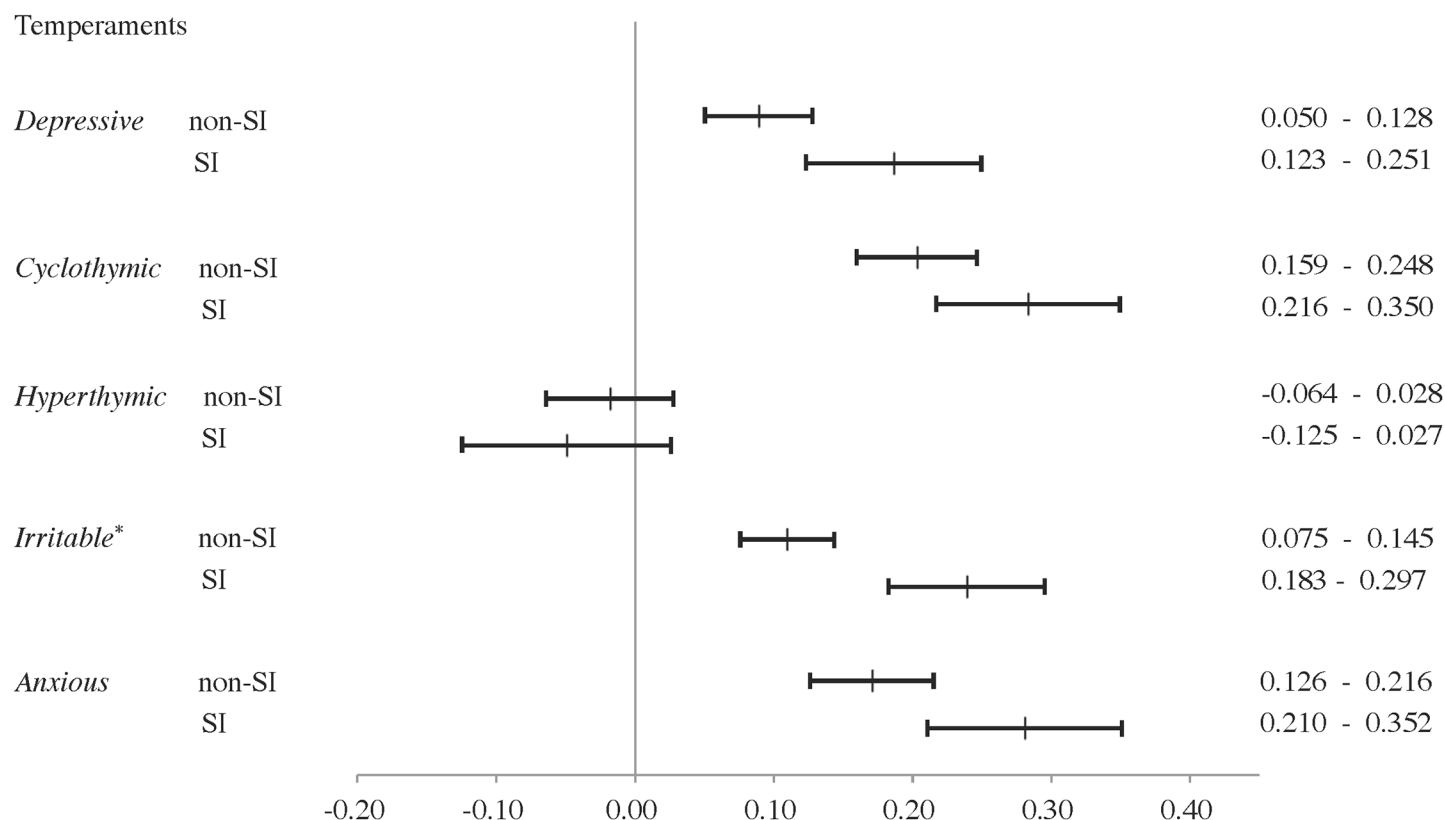

**Fig 2. Comparison of TEMPS-A scores between women with or without suicide-related ideations on TEMPS-A scores via 95% confidence intervals.** SI, depressive symptoms with suicide-related ideations; non-SI, depressive symptoms without suicide-related ideations; TEMPS-A, Temperament Evaluation of Memphis, Pisa, Paris, and San Diego Auto-questionnaire. \* 95% Confidence Intervals of non-SI group did not overlap with those of the SI group.

<https://doi.org/10.1371/journal.pone.0179952.g002>

In the present study, the irritable temperament was significantly associated with suicide-related ideations in women. The irritable temperament is thought to be a strong predictor of suicidal behavior in clinical populations [13, 22, 25, 39], while the combination of irritable temperament and major depressive episodes results in a mixed depressive state, which is thought to be one of the most important risk factors for suicide [40, 41]. Several previous studies have revealed that the relationship between irritable temperament and suicide-related ideations, however among the general female population remains unclear [20, 26, 42]. Furthermore, the reason for this gender difference remains unclear as well.

In the present study, no significant differences in cyclothymic temperament were observed among participants with and without suicide-related ideations, although the 95% confidence intervals of differences in cyclothymic temperament between the NC and non-SI/SI groups did not overlap. These findings suggest that cyclothymic temperament is related to depressive symptoms, but not to suicide-related ideations. Recent reports have suggested that cyclothymic temperament plays a significant role in the development of suicidal behavior among patients with mood disorders [39]. In a previous study, patients with cyclothymic temperament and bipolar II disorder experienced greater numbers of lifetime suicide attempts and suicide-related hospitalizations than those without cyclothymic temperament [43]. Additional studies have reported that cyclothymic temperament is significantly associated with suicide attempts in clinical populations [22–24]. A recent study reported that patients with mood disorders and cyclothymic temperament have a higher risk of suicide than those without cyclothymic



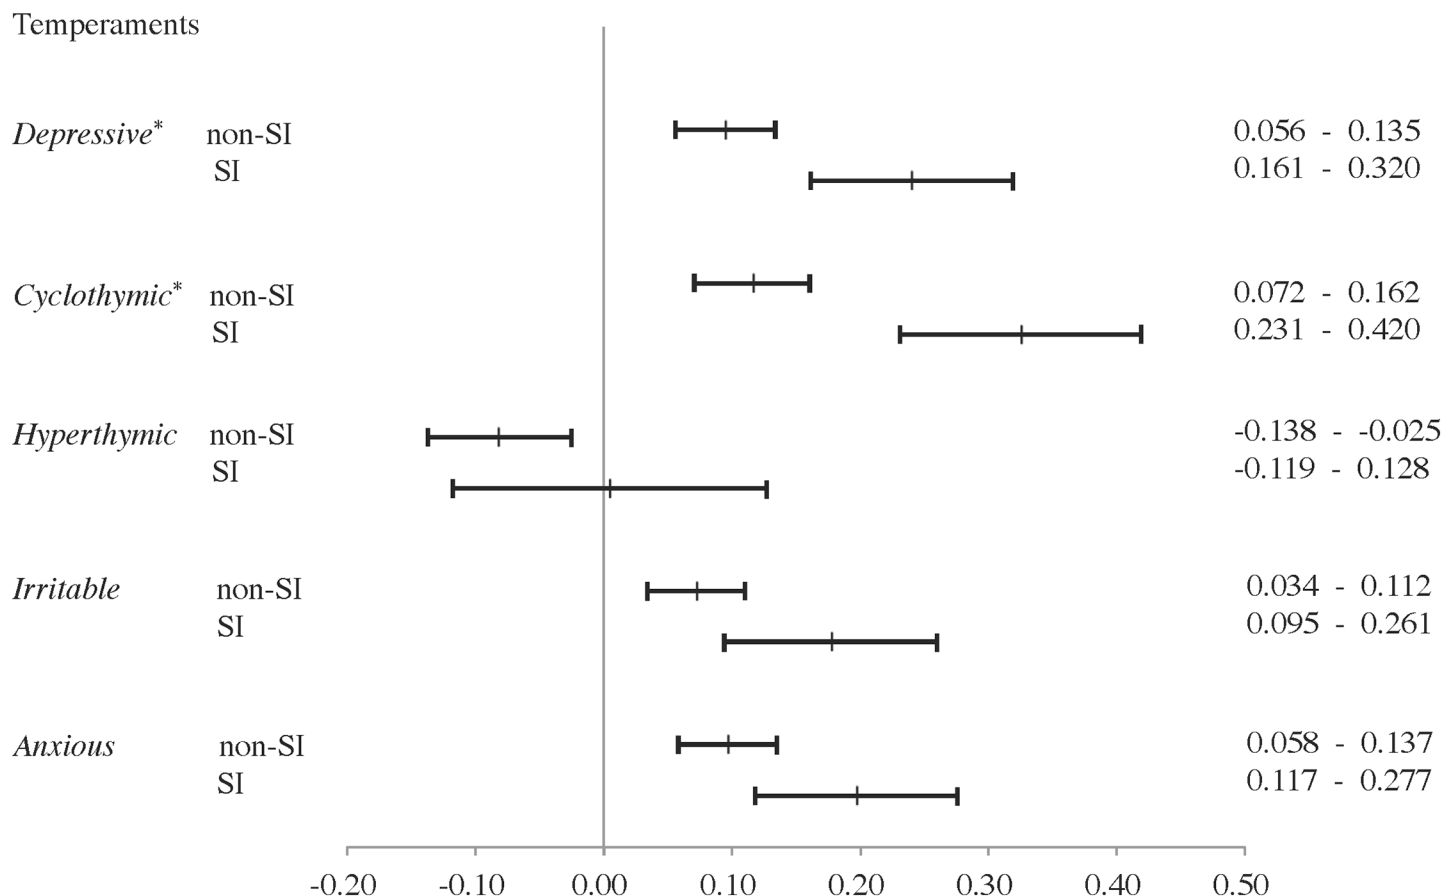

**Fig 3. Comparison between depressive men with or without suicide-related ideations on TEMPS-A scores by 95% confidence intervals.** SI, depressive symptoms with suicide-related ideations; non-SI, depressive symptoms without suicide-related ideations; TEMPS-A, Temperament Evaluation of Memphis, Pisa, Paris, and San Diego Auto-questionnaire. \* 95% Confidence Intervals of non-SI group did not overlap with those of the SI group.

<https://doi.org/10.1371/journal.pone.0179952.g003>

temperament [17]. Moreover, cyclothymic temperament has been associated with psychiatric conditions other than mood disorders, such as borderline personality disorder, alcohol related disorders, and bulimia nervosa [44], which are known as high risk factors for suicidal behavior [45, 46]. Previous studies have also suggested that cyclothymic temperament was associated with both suicide attempts and suicidal ideation among children and adolescents with mood disorders [24]. These findings are also consistent with the results of a previous study involving patients in primary care settings, which reported that cyclothymic and depressive temperaments were significantly associated with personal history of suicide attempts [20]. In a study of non-clinical college students, cyclothymic, depressive, and anxious temperaments were significantly associated with suicidal ideation [26]. In a review of affective temperaments in the general population, Vazquez et al. revealed that cyclothymic temperament did not correlate with depressive temperament [42]. These findings suggest that the effect of cyclothymic temperament on suicide-related ideations differs from that of depressive temperament.

We also observed that anxious temperament was associated with suicide-related ideations among the general population in the present study. Previous studies have also reported that anxious temperament is significantly associated with suicide risk among psychiatric inpatients [25], with nonviolent suicide attempts [22], and with family history of suicide attempts [20]. In a recent large-scale study involving participants from among the general population, the

TEMPS-A anxious temperament was identified as a strong risk factor for suicide attempts [18].

However, hyperthymic temperament did not significantly differ between participants with and without suicide-related ideations in the present study, consistent in part with the results of several previous studies, which suggested that hyperthymic temperament may be a protective factor against both suicide risk and hopelessness [13, 39].

The cross-sectional study design is a main limitation of the present study. Thus, additional prospective longitudinal studies are required in order to more fully elucidate factors predictive of suicide-related ideations. Furthermore, we observed some differences in the distribution of gender and educational experience among the three groups, which may have influenced the outcome of our study. Since we excluded non-depressive participants with suicide-related ideations, we could not analyze these populations. In the future, we need another study for investigating TEMPS-A of non-depressive populations with suicide-related ideations. Additionally, since the number of male participants with suicide-related ideations was small, the results of the Kruskal-Wallis tests were not entirely consistent with the results of the statistical estimations, which were described as 95% confidence intervals. The use of the PHQ-9 to evaluate suicide-related ideations represents another major limitation of the present study, as thoughts of suicide generally differ from thoughts of self-harm in a number of respects. Hence, a specific scale for the evaluation of suicidal ideation should be utilized in future studies. The results of the present study could not be generalized to other populations in different countries, because both universal and cultural specificity of affective temperaments were suggested in the previous study [42].

## Conclusions

Our findings indicate that the TEMPS-A depressive, irritable, and anxious temperaments are significant risk factors for suicide-related ideations in the Japanese non-clinical general adult population. We further observed that the TEMPS-A depressive temperament is a specific risk factor for suicide-related ideations among men, while the TEMPS-A irritable temperament is specific risk factor for suicide-related ideations among women.

## Author Contributions

**Conceptualization:** Nobuyuki Mitsui, Takeshi Inoue.

**Data curation:** Nobuyuki Mitsui, Yukiei Nakai, Takeshi Inoue.

**Formal analysis:** Nobuyuki Mitsui, Takeshi Inoue, Yoichi M. Ito.

**Funding acquisition:** Takeshi Inoue.

**Investigation:** Nobuyuki Mitsui, Yukiei Nakai, Takeshi Inoue, Kan Kitagawa, Yumi Wakatsuki, Rie Kameyama, Yuji Kitaichi, Shin Nakagawa.

**Methodology:** Nobuyuki Mitsui, Takeshi Inoue, Atsuhito Toyomaki, Yoichi M. Ito.

**Project administration:** Nobuyuki Mitsui, Takeshi Inoue.

**Software:** Nobuyuki Mitsui.

**Supervision:** Shin Nakagawa, Ichiro Kusumi.

**Validation:** Nobuyuki Mitsui, Yukiei Nakai, Takeshi Inoue, Niki Udo, Kan Kitagawa, Yumi Wakatsuki, Rie Kameyama, Yuji Kitaichi, Shin Nakagawa.

**Visualization:** Nobuyuki Mitsui, Yoichi M. Ito.

**Writing – original draft:** Nobuyuki Mitsui.

**Writing – review & editing:** Takeshi Inoue, Shin Nakagawa, Ichiro Kusumi.

## References

1. Hawton K, Saunders KE. Psychiatric service development and suicide. *Lancet*. 2009; 373(9658):99–100. [https://doi.org/10.1016/S0140-6736\(08\)61871-1](https://doi.org/10.1016/S0140-6736(08)61871-1) PMID: 19097637.
2. Oquendo MA, Currier D, Mann JJ. Prospective studies of suicidal behavior in major depressive and bipolar disorders: what is the evidence for predictive risk factors? *Acta Psychiatr Scand*. 2006; 114(3):151–8. <https://doi.org/10.1111/j.1600-0447.2006.00829.x> PMID: 16889585.
3. Owens D, Horrocks J, House A. Fatal and non-fatal repetition of self-harm. Systematic review. *Br J Psychiatry*. 2002; 181:193–9. PMID: 12204922.
4. Isometsa ET, Lonnqvist JK. Suicide attempts preceding completed suicide. *Br J Psychiatry*. 1998; 173:531–5. PMID: 9926085.
5. Paris J. Predicting and preventing suicide: do we know enough to do either? *Harv Rev Psychiatry*. 2006; 14(5):233–40. <https://doi.org/10.1080/10673220600968662> PMID: 16990168.
6. Brezo J, Paris J, Turecki G. Personality traits as correlates of suicidal ideation, suicide attempts, and suicide completions: a systematic review. *Acta Psychiatr Scand*. 2006; 113(3):180–206. <https://doi.org/10.1111/j.1600-0447.2005.00702.x> PMID: 16466403.
7. Mitsui N, Asakura S, Inoue T, Shimizu Y, Fujii Y, Kako Y, et al. Temperament and character profiles of Japanese university student suicide completers. *Compr Psychiatry*. 2013; 54(5):556–61. <https://doi.org/10.1016/j.comppsy.2012.11.002> PMID: 23246072.
8. Beevers CG, Miller IW. Perfectionism, cognitive bias, and hopelessness as prospective predictors of suicidal ideation. *Suicide Life Threat Behav*. 2004; 34(2):126–37. <https://doi.org/10.1521/suli.34.2.126.32791> PMID: 15191269.
9. Conrad R, Walz F, Geiser F, Imbierowicz K, Liedtke R, Wegener I. Temperament and character personality profile in relation to suicidal ideation and suicide attempts in major depressed patients. *Psychiatry Res*. 2009; 170(2–3):212–7. S0165-1781(08)00347-8 [pii] <https://doi.org/10.1016/j.psychres.2008.09.008> PMID: 19897251.
10. Mitsui N, Asakura S, Shimizu Y, Fujii Y, Kako Y, Tanaka T, et al. Temperament and character profiles of Japanese university students with depressive episodes and ideas of suicide or self-harm: A PHQ-9 screening study. *Compr Psychiatry*. 2013; 54(8):1215–21. <https://doi.org/10.1016/j.comppsy.2013.05.014> PMID: 23849616.
11. Statham DJ, Heath AC, Madden PA, Bucholz KK, Bierut L, Dinwiddie SH, et al. Suicidal behaviour: an epidemiological and genetic study. *Psychol Med*. 1998; 28(4):839–55. PMID: 9723140.
12. Calati R, Giegling I, Rujescu D, Hartmann AM, Moller HJ, De Ronchi D, et al. Temperament and character of suicide attempters. *J Psychiatr Res*. 2008; 42(11):938–45. <https://doi.org/10.1016/j.jpsychires.2007.10.006> PMID: 18054960.
13. Rihmer Z, Akiskal KK, Rihmer A, Akiskal HS. Current research on affective temperaments. *Curr Opin Psychiatry*. 2010; 23(1):12–8. <https://doi.org/10.1097/YCO.0b013e32833299d4> PMID: 19809321.
14. Akiskal HS, Akiskal KK, Haykal RF, Manning JS, Connor PD. TEMPS-A: progress towards validation of a self-rated clinical version of the Temperament Evaluation of the Memphis, Pisa, Paris, and San Diego Autoquestionnaire. *J Affect Disord*. 2005; 85(1–2):3–16. <https://doi.org/10.1016/j.jad.2004.12.001> PMID: 15780671.
15. Akiskal HS. Toward a definition of generalized anxiety disorder as an anxious temperament type. *Acta Psychiatr Scand Suppl*. 1998; 393:66–73. PMID: 9777050.
16. Baldessarini RJ, Vazquez GH, Tondo L. Affective temperaments and suicidal ideation and behavior in mood and anxiety disorder patients. *J Affect Disord*. 2016; 198:78–82. <https://doi.org/10.1016/j.jad.2016.03.002> PMID: 27011363.
17. Innamorati M, Rihmer Z, Akiskal H, Gonda X, Erbuto D, Belvederi Murri M, et al. Cyclothymic temperament rather than polarity is associated with hopelessness and suicidality in hospitalized patients with mood disorders. *J Affect Disord*. 2015; 170:161–5. <https://doi.org/10.1016/j.jad.2014.08.042> PMID: 25240844.
18. Karam EG, Itani L, Fayyad J, Hantouche E, Karam A, Mneimneh Z, et al. Temperament and suicide: A national study. *J Affect Disord*. 2015; 184:123–8. <https://doi.org/10.1016/j.jad.2015.05.047> PMID: 26080077.

19. Rihmer Z, Gonda X. Predisposition for self-destruction? Affective temperaments as a suicide risk factor in patients with mood disorders. *Crisis*. 2012; 33(6):309–12. <https://doi.org/10.1027/0227-5910/a000192> PMID: 23165107.
20. Rihmer Z, Gonda X, Torzsa P, Kalabay L, Akiskal HS, Eory A. Affective temperament, history of suicide attempt and family history of suicide in general practice patients. *J Affect Disord*. 2013; 149(1–3):350–4. <https://doi.org/10.1016/j.jad.2013.02.010> PMID: 23477849.
21. Pompili M, Innamorati M, Raja M, Falcone I, Ducci G, Angeletti G, et al. Suicide risk in depression and bipolar disorder: Do impulsiveness-aggressiveness and pharmacotherapy predict suicidal intent? *Neuropsychiatric disease and treatment*. 2008; 4(1):247–55. PMID: 18728807.
22. Rihmer A, Rozsa S, Rihmer Z, Gonda X, Akiskal KK, Akiskal HS. Affective temperaments, as measured by TEMPS-A, among nonviolent suicide attempters. *J Affect Disord*. 2009; 116(1–2):18–22. <https://doi.org/10.1016/j.jad.2008.10.024> PMID: 19036456.
23. Azorin JM, Kaladjian A, Adida M, Hantouche E, Hameg A, Lancrenon S, et al. Risk factors associated with lifetime suicide attempts in bipolar I patients: findings from a French National Cohort. *Compr Psychiatry*. 2009; 50(2):115–20. <https://doi.org/10.1016/j.comppsych.2008.07.004> PMID: 19216887.
24. Kochman FJ, Hantouche EG, Ferrari P, Lancrenon S, Bayart D, Akiskal HS. Cyclothymic temperament as a prospective predictor of bipolarity and suicidality in children and adolescents with major depressive disorder. *J Affect Disord*. 2005; 85(1–2):181–9. <https://doi.org/10.1016/j.jad.2003.09.009> PMID: 15780688.
25. Pompili M, Rihmer Z, Akiskal HS, Innamorati M, Iliceto P, Akiskal KK, et al. Temperament and personality dimensions in suicidal and nonsuicidal psychiatric inpatients. *Psychopathology*. 2008; 41(5):313–21. <https://doi.org/10.1159/000146069> PMID: 18635934.
26. Skala K, Kapusta ND, Schlaflaff G, Unseld M, Erfurth A, Lesch OM, et al. Suicidal ideation and temperament: an investigation among college students. *J Affect Disord*. 2012; 141(2–3):399–405. <https://doi.org/10.1016/j.jad.2012.03.010> PMID: 22475473.
27. Nakai Y, Inoue T, Toda H, Toyomaki A, Nakato Y, Nakagawa S, et al. The influence of childhood abuse, adult stressful life events and temperaments on depressive symptoms in the nonclinical general adult population. *J Affect Disord*. 2014; 158:101–7. <https://doi.org/10.1016/j.jad.2014.02.004> PMID: 24655773.
28. Nakai Y, Inoue T, Chen C, Toda H, Toyomaki A, Nakato Y, et al. The moderator effects of affective temperaments, childhood abuse and adult stressful life events on depressive symptoms in the nonclinical general adult population. *J Affect Disord*. 2015; 187:203–10. <https://doi.org/10.1016/j.jad.2015.08.011> PMID: 26342173.
29. Spitzer RL, Kroenke K, Williams JB. Validation and utility of a self-report version of PRIME-MD: the PHQ primary care study. *Primary Care Evaluation of Mental Disorders. Patient Health Questionnaire*. *JAMA*. 1999; 282(18):1737–44. PMID: 10568646.
30. Gilbody S, Richards D, Brealey S, Hewitt C. Screening for depression in medical settings with the Patient Health Questionnaire (PHQ): a diagnostic meta-analysis. *J Gen Intern Med*. 2007; 22(11):1596–602. <https://doi.org/10.1007/s11606-007-0333-y> PMID: 17874169.
31. Wittkamp KA, Naeije L, Schene AH, Huyser J, van Weert HC. Diagnostic accuracy of the mood module of the Patient Health Questionnaire: a systematic review. *Gen Hosp Psychiatry*. 2007; 29(5):388–95. <https://doi.org/10.1016/j.genhosppsych.2007.06.004> PMID: 17888804.
32. Muramatsu K, Miyaoka H, Kamijima K, Muramatsu Y, Yoshida M, Otsubo T, et al. The patient health questionnaire, Japanese version: validity according to the mini-international neuropsychiatric interview-plus. *Psychol Rep*. 2007; 101(3 Pt 1):952–60. PMID: 18232454. <https://doi.org/10.2466/pr0.101.3.952-960>
33. Inoue T, Tanaka T, Nakagawa S, Nakato Y, Kameyama R, Boku S, et al. Utility and limitations of PHQ-9 in a clinic specializing in psychiatric care. *BMC psychiatry*. 2012; 12:73. <https://doi.org/10.1186/1471-244X-12-73> PMID: 22759625.
34. Kroenke K, Spitzer RL, Williams JB. The PHQ-9: validity of a brief depression severity measure. *J Gen Intern Med*. 2001; 16(9):606–13. PMID: 11556941. <https://doi.org/10.1046/j.1525-1497.2001.016009606.x>
35. Matsumoto S, Akiyama T, Tsuda H, Miyake Y, Kawamura Y, Noda T, et al. Reliability and validity of TEMPS-A in a Japanese non-clinical population: application to unipolar and bipolar depressives. *J Affect Disord*. 2005; 85(1–2):85–92. <https://doi.org/10.1016/j.jad.2003.10.001> PMID: 15780679.
36. Guerreiro DF, Sampaio D, Rihmer Z, Gonda X, Figueira ML. Affective temperaments and self-harm in adolescents: a cross-sectional study from a community sample. *J Affect Disord*. 2013; 151(3):891–8. <https://doi.org/10.1016/j.jad.2013.07.034> PMID: 24035491.
37. Chatard A, Selimbegovic L, Konan PND. Self-esteem and suicide rates in 55 nations. *European Journal of Personality*. 2009; 23(1):pp. <https://doi.org/10.1002/per.701> PMID: 2009-02105-003.

38. Mitsui N, Asakura S, Shimizu Y, Fujii Y, Toyomaki A, Kako Y, et al. The association between suicide risk and self-esteem in Japanese university students with major depressive episodes of major depressive disorder. *Neuropsychiatric disease and treatment*. 2014; 10:811–6. <https://doi.org/10.2147/NDT.S59349> PMID: 24868158.
39. Pompili M, Rihmer Z, Innamorati M, Lester D, Girardi P, Tatarelli R. Assessment and treatment of suicide risk in bipolar disorders. *Expert Rev Neurother*. 2009; 9(1):109–36. <https://doi.org/10.1586/14737175.9.1.109> PMID: 19102673.
40. Akiskal HS, Benazzi F, Perugi G, Rihmer Z. Agitated "unipolar" depression re-conceptualized as a depressive mixed state: implications for the antidepressant-suicide controversy. *J Affect Disord*. 2005; 85(3):245–58. <https://doi.org/10.1016/j.jad.2004.12.004> PMID: 15780694.
41. Balazs J, Benazzi F, Rihmer Z, Rihmer A, Akiskal KK, Akiskal HS. The close link between suicide attempts and mixed (bipolar) depression: implications for suicide prevention. *J Affect Disord*. 2006; 91(2–3):133–8. <https://doi.org/10.1016/j.jad.2005.12.049> PMID: 16458364.
42. Vazquez GH, Tondo L, Mazzarini L, Gonda X. Affective temperaments in general population: a review and combined analysis from national studies. *J Affect Disord*. 2012; 139(1):18–22. <https://doi.org/10.1016/j.jad.2011.06.032> PMID: 21774989.
43. Akiskal HS, Hantouche EG, Allilaire JF. Bipolar II with and without cyclothymic temperament: "dark" and "sunny" expressions of soft bipolarity. *J Affect Disord*. 2003; 73(1–2):49–57. PMID: 12507737.
44. Perugi G, Toni C, Traverso MC, Akiskal HS. The role of cyclothymia in atypical depression: toward a data-based reconceptualization of the borderline-bipolar II connection. *J Affect Disord*. 2003; 73(1–2):87–98. PMID: 12507741.
45. Cavanagh JT, Carson AJ, Sharpe M, Lawrie SM. Psychological autopsy studies of suicide: a systematic review. *Psychol Med*. 2003; 33(3):395–405. PMID: 12701661.
46. Svirko E, Hawton K. Self-injurious behavior and eating disorders: the extent and nature of the association. *Suicide Life Threat Behav*. 2007; 37(4):409–21. <https://doi.org/10.1521/suli.2007.37.4.409> PMID: 17896881.
